# Supplementary material for: Widespread Genomic Incompatibilities in Caenorhabditis elegans
Source: PubMed Central journal article supplement (PMC4199689; doi:10.1534/g3.114.013151), 2014-08-15
Supplement: supp_g3.114.013151_TableS1.pdf [file supp_g3.114.013151_TableS1.pdf]

**Table S1 IL vs IL Egg-stages. Significance scores in  $-\log_{10}(p)$**

| ID | Test order | Scores (chi-square test) | N2L     | CBL     | CBR     | N2R     | CB_late_stage |
|----|------------|--------------------------|---------|---------|---------|---------|---------------|
| 1  | N2 → 1     | 1.76                     |         |         |         |         |               |
| 2  | N2 → 2     | 3.33                     |         |         |         |         |               |
| 3  | N2 → 3     | 17.51                    | 2818974 | 3502476 | 3502476 | 4338254 | +             |
| 3  | 3 → 6      | 5.17                     |         |         |         |         |               |
| 3  | 6 → 7      | 4.01                     |         |         |         |         |               |
| 4  | N2 → 13    | 13.13                    |         | 1025990 | 1025990 | 1108529 | +             |
|    |            |                          | 9569913 | 9       | 9       | 5       |               |
| 4  | 13 → 8     | 2.82                     |         |         |         |         |               |
| 4  | 8 → 5      | 3.62                     |         |         |         |         |               |
| 4  | 5 → 7      | 1.23                     |         |         |         |         |               |
| 5  | N2 → 6     | 15.88                    | 2818974 | 3502476 | 8654361 | 9569913 | +             |
| 6  | N2 → 13    | 13.13                    |         | 1025990 | 1025990 | 1108529 | +             |
|    |            |                          | 9569913 | 9       | 9       | 5       |               |
| 6  | 13 → 14    | 12.83                    | 1108529 | 1108529 | 1108529 | 1176017 | -             |
|    |            |                          | 5       | 5       | 5       | 9       |               |
| 7  | N2 → 8     | 14.34                    |         | 9569913 | 1025990 | 1108529 | +             |
|    |            |                          | 8654361 | 9       | 9       | 5       |               |
| 7  | 8 → 9      | 12.02                    | 1108529 | 1108529 | 1108529 | 1176017 | -             |
|    |            |                          | 5       | 5       | 5       | 9       |               |
| 7  | 9 → 11     | 4.56                     |         |         |         |         |               |
| 7  | 11 → 12    | 0.44                     |         |         |         |         |               |
| 8  | N2 → 18    | 1.18                     |         |         |         |         |               |
| 8  | 18 → 17    | 1.26                     |         |         |         |         |               |
| 8  | 17 → 16    | 0.5                      |         |         |         |         |               |
| 8  | 16 → 15    | 10.26                    | 1025990 | 1108529 | 1108529 | 1176017 | +             |
|    |            |                          | 9       | 5       | 5       | 9       |               |
| 8  | 15 → 12    | 3.0                      |         |         |         |         |               |
|    |            |                          |         |         |         |         |               |
| 9  | N2 → 19    | 0.58                     |         |         |         |         |               |
| 9  | 19 → 20    | 1.33                     |         |         |         |         |               |
| 9  | 20 → 21    | 16.16                    | 2755074 | 3403575 | 4147051 | 4800868 | +             |
| 9  | 21 → 22    | 33.06                    |         |         | 1041407 | 1118083 | -             |
|    |            |                          | 4147051 | 4800868 | 3       | 6       |               |
| 10 | N2 → 23    | 1.45                     |         |         |         |         |               |
| 10 | 23 → 22    | 1.21                     |         |         |         |         |               |
| 11 | N2 → 26    | 2.46                     |         |         |         |         |               |
| 11 | 26 → 27    | 1.54                     |         |         |         |         |               |
|    |            |                          |         |         |         |         |               |
| 12 | N2 → 33    | 4.43                     |         |         |         |         |               |
| 12 | 33 → 30    | 3.94                     |         |         |         |         |               |

|        |         |       |              |              |              |              |   |
|--------|---------|-------|--------------|--------------|--------------|--------------|---|
| 1<br>2 | 30 → 28 | 9.34  |              |              |              |              |   |
| 1<br>3 | N2 → 29 | 3.68  |              |              |              |              |   |
| 1<br>3 | 29 → 30 | 3.92  |              |              |              |              |   |
| 1<br>4 | N2 → 32 | 0.38  |              |              |              |              |   |
| 1<br>5 | N2 → 33 | 4.43  |              |              |              |              |   |
| 1<br>5 | 33 → 34 | 6.97  |              |              |              |              |   |
| 1<br>5 | 34 → 35 | 10.31 | 5431252      | 5925983      | 9308858      | 1002749<br>6 | - |
| 1<br>5 | 35 → 38 | 9.13  |              |              |              |              |   |
| 1<br>6 | N2 → 41 | 33.67 | 7998164      | 8318553      | 1061311<br>9 | 1134112<br>0 | + |
| 1<br>6 | 41 → 39 | 35.77 | 5925983      | 6847169      | 7998164      | 8318553      | - |
| 1<br>7 | N2 → 40 | 1.88  |              |              |              |              |   |
| 1<br>7 | 40 → 41 | 38.72 | 1002749<br>6 | 1061311<br>9 | 1061311<br>9 | 1134112<br>0 | + |
| 1<br>7 | 41 → 42 | 26.10 | 1061311<br>9 | 1134112<br>0 | 1134112<br>0 | 1230172<br>5 | - |
| 1<br>8 | N2 → 43 | 1.26  |              |              |              |              |   |
| 1<br>8 | 43 → 44 | 0.89  |              |              |              |              |   |
| 1<br>9 | N2 → 44 | 0.16  |              |              |              |              |   |
| 2<br>0 | 44 → 38 | 2.14  |              |              |              |              |   |
| 2<br>1 | N2 → 45 | 9.89  | 0            | 151889       | 1381409      | 2288742      | + |
| 2<br>1 | 45 → 46 | 0.16  |              |              |              |              |   |
| 2<br>1 | 46 → 47 | 1.26  |              |              |              |              |   |
| 2<br>2 | N2 → 53 | 12.90 | 2288742      | 3067374      | 3067374      | 3920366      | + |
| 2<br>2 | 53 → 49 | 0.32  |              |              |              |              |   |
| 2<br>2 | 49 → 48 | 2.25  |              |              |              |              |   |
| 2<br>2 | 48 → 47 | 0.71  |              |              |              |              |   |
| 2      | N2 → 49 | 12.88 | 1381409      | 2288742      | 3067374      | 3920366      | + |

|        |                                   |                       |              |              |              |              |   |
|--------|-----------------------------------|-----------------------|--------------|--------------|--------------|--------------|---|
| 3      |                                   |                       |              |              |              |              |   |
| 2<br>3 | 49 → 50                           | 0.58                  |              |              |              |              |   |
| 2<br>3 | 50 → 51                           | 4.17                  |              |              |              |              |   |
| 2<br>3 | 51 → 4001                         | 0.80                  |              |              |              |              |   |
| 2<br>3 | 4001 → 52                         | 0.80                  |              |              |              |              |   |
| 2<br>4 | N2 → 53                           | 12.90                 | 2288742      | 3067374      | 3067374      | 3920366      | + |
| 2<br>4 | 53 →<br>4002,4003,40<br>04        | 2.23,1.25,1.<br>12    |              |              |              |              |   |
| 2<br>5 | N2 → 59                           | 2.32                  |              |              |              |              |   |
| 2<br>5 | 59 → 4011                         | 12.72                 | 1090956<br>0 | 1166824<br>2 | 1166824<br>2 | 1274888<br>0 | + |
| 2<br>5 | 4011 →<br>4010,56                 | 11.89,21.71           | 1012293<br>0 | 1090956<br>0 | 1090956<br>0 | 1166824<br>2 | - |
| 2<br>5 | 4010,56 → 55                      | 6.67,4.10             |              |              |              |              |   |
| 2<br>5 | 55 → 54                           | 8.87                  |              |              |              |              |   |
| 2<br>5 | 54 →<br>4009,4008,40<br>07        | 2.13,5.69,9.<br>40    |              |              |              |              |   |
| 2<br>5 | 4009,4008,40<br>07 →<br>4006,4005 | 4005 vs<br>4009 12.22 |              |              |              |              |   |
| 2<br>5 | 4006,4005 →<br>4004,4003,40<br>02 | NS                    |              |              |              |              |   |
| 2<br>5 | 4004,4003,40<br>02 → 52           | NS                    |              |              |              |              |   |
| 2<br>6 | N2 → 56,4010                      | 0.71,2.00             |              |              |              |              |   |
| 2<br>6 | 56,4010 → 58                      | 8.57,1.45             |              |              |              |              |   |
| 2<br>7 | N2 → 59                           | 2.32                  |              |              |              |              |   |
| 2<br>7 | 59 → 60                           | 0.78                  |              |              |              |              |   |
| 2<br>8 | N2 → 61                           | 0.19                  |              |              |              |              |   |
| 2<br>9 | N2 → 66                           | 2.55                  |              |              |              |              |   |
| 2<br>9 | 66 → 65                           | 3.88                  |              |              |              |              |   |

|        |         |       |              |              |              |              |   |
|--------|---------|-------|--------------|--------------|--------------|--------------|---|
| 3<br>0 | N2 → 67 | 0.80  |              |              |              |              |   |
| 3<br>0 | 67 → 68 | 1.39  |              |              |              |              |   |
| 3<br>1 | N2 → 72 | 0.97  |              |              |              |              |   |
| 3<br>1 | 72 → 71 | 6.62  |              |              |              |              |   |
| 3<br>1 | 71 → 68 | 3.33  |              |              |              |              |   |
| 3<br>2 | N2 → 77 | 26.95 | 1857459<br>3 | 1952556<br>1 | 2075835<br>2 | 2089378<br>4 | + |
| 3<br>2 | 77 → 76 | 21.39 | 1737715<br>8 | 1857459<br>3 | 1857459<br>3 | 1952556<br>1 | - |
| 3<br>2 | 76 → 75 | 4.50  |              |              |              |              |   |
| 3<br>2 | 75 → 70 | 14.74 | 1036866<br>0 | 1091299<br>4 | 1600840<br>4 | 1737715<br>8 | + |
| 3<br>2 | 70 → 69 | 6.89  |              |              |              |              |   |
| 3<br>3 | N2 → 73 | 2.54  |              |              |              |              |   |
| 3<br>3 | 73 → 74 | 6.60  |              |              |              |              |   |
|        |         |       |              |              |              |              |   |
| 3<br>4 | N2 → 78 | 8.08  |              |              |              |              |   |
| 3<br>4 | 78 → 79 | 3.50  |              |              |              |              |   |
| 3<br>4 | 79 → 80 | 2.20  |              |              |              |              |   |
| 3<br>4 | 80 → 81 | 7.58  |              |              |              |              |   |
| 3<br>5 | N2 → 83 | 1.50  |              |              |              |              |   |
| 3<br>5 | 83 → 84 | 5.25  |              |              |              |              |   |
| 3<br>6 | N2 → 85 | 10.19 | 5770179      | 7067019      | 7982354      | 8691677      | + |
| 3<br>6 | 85 → 84 | 16.25 | 5010049      | 5770179      | 5770179      | 7067019      | - |
| 3<br>7 | N2 → 87 | 7.31  |              |              |              |              |   |
| 3<br>7 | 87 → 88 | 7.78  |              |              |              |              |   |
| 3<br>8 | N2 → 89 | 5.13  |              |              |              |              |   |
| 3<br>8 | 89 → 90 | 2.83  |              |              |              |              |   |
|        |         |       |              |              |              |              |   |

IL vs IL Size

| ID | Test order | Scores (t-test) | N2L      | CBL      | CBR      | N2R      | CB_Size |
|----|------------|-----------------|----------|----------|----------|----------|---------|
| 9  | N2 → 19    | 0.27            |          |          |          |          |         |
| 9  | 19 → 20    | 0.67            |          |          |          |          |         |
| 9  | 20 → 21    | 0.29            |          |          |          |          |         |
| 9  | 21 → 22    | 0.40            |          |          |          |          |         |
| 10 | N2 → 23    | 0.46            |          |          |          |          |         |
| 10 | 23 → 22    | 0.01            |          |          |          |          |         |
| 11 | N2 → 26    | 0.59            |          |          |          |          |         |
| 11 | 26 → 27    | 0.52            |          |          |          |          |         |
|    |            |                 |          |          |          |          |         |
| 21 | N2 → 45    | 0.10            |          |          |          |          |         |
| 21 | 45 → 46    | 0.68            |          |          |          |          |         |
| 21 | 46 → 47    | 0.19            |          |          |          |          |         |
| 22 | N2 → 53    | 0.29            |          |          |          |          |         |
| 22 | 53 → 49    | 0.03            |          |          |          |          |         |
| 22 | 49 → 48    | 1.11            |          |          |          |          |         |
| 22 | 48 → 47    | 0.31            |          |          |          |          |         |
| 23 | N2 → 49    | 0.42            |          |          |          |          |         |
| 23 | 49 → 50    | 0.08            |          |          |          |          |         |
| 23 | 50 → 51    | 0.26            |          |          |          |          |         |
| 23 | 51 → 52    | 1.30            | 5819735  | 6599685  | 12748880 | 13667267 | -       |
| 24 | N2 → 53    | 0.29            |          |          |          |          |         |
| 25 | N2 → 59    | 1.45            | 11668242 | 12748880 | 12748880 | 13667267 | +       |
| 25 | 59 → 56    | 1.08            |          |          |          |          |         |
| 25 | 56 → 55    | 0.34            |          |          |          |          |         |
| 25 | 55 → 54    | 1.37            | 8397264  | 9102404  | 9102404  | 10122930 | +       |
| 25 | 54 → 52    | 1.01            |          |          |          |          |         |
| 26 | N2 → 56    | 0.05            |          |          |          |          |         |
| 26 | 56 → 58    | 1.18            |          |          |          |          |         |
| 27 | N2 → 59    | 1.45            | 11668242 | 12748880 | 12748880 | 13667267 | +       |
| 27 | 59 → 60    | 0.03            |          |          |          |          |         |
| 28 | N2 → 62    | 1.64            | 12748880 | 13667267 | 16371991 | 17084259 | -       |

IL vs IL Lifespan

| ID | Test order | Scores (t-test) | N2L     | CBL     | CBR      | N2R      | CB_Lifespan |
|----|------------|-----------------|---------|---------|----------|----------|-------------|
| 9  | N2 → 19    | 0.07            |         |         |          |          |             |
| 9  | 19 → 20    | 0.17            |         |         |          |          |             |
| 9  | 20 → 21    | 0.46            |         |         |          |          |             |
| 9  | 21 → 22    | 2.69            | 4147051 | 4800868 | 10414073 | 11180836 | +           |
| 10 | N2 → 23    | 0.09            |         |         |          |          |             |
| 10 | 23 → 22    | 1.75            | 0       | 176721  | 2755074  | 3403575  | +           |

|    |         |      |         |         |         |         |   |
|----|---------|------|---------|---------|---------|---------|---|
| 11 | N2 → 26 | 0.96 |         |         |         |         |   |
| 11 | 26 → 27 | 0.02 |         |         |         |         |   |
|    |         |      |         |         |         |         |   |
| 21 | N2 → 45 | 0.20 |         |         |         |         |   |
| 21 | 45 → 46 | 0.13 |         |         |         |         |   |
| 21 | 46 → 47 | 0.16 |         |         |         |         |   |
| 22 | N2 → 53 | 0.89 |         |         |         |         |   |
| 22 | 53 → 49 | 0.50 |         |         |         |         |   |
| 22 | 49 → 48 | 0.24 |         |         |         |         |   |
| 22 | 48 → 47 | 0.55 |         |         |         |         |   |
| 23 | N2 → 49 | 0.24 |         |         |         |         |   |
| 23 | 49 → 50 | 0.09 |         |         |         |         |   |
| 23 | 50 → 51 | 1.30 | 3920366 | 4991858 | 5819735 | 6599685 | - |
| 23 | 51 → 52 | 0.65 |         |         |         |         |   |
| 24 | N2 → 53 | 0.89 |         |         |         |         |   |
| 25 | N2 → 59 | 0.38 |         |         |         |         |   |
| 25 | 59 → 56 | 0.17 |         |         |         |         |   |
| 25 | 56 → 55 | 0.73 |         |         |         |         |   |
| 25 | 55 → 54 | 0.26 |         |         |         |         |   |
| 25 | 54 → 52 | 0.77 |         |         |         |         |   |
| 26 | N2 → 56 | 0.54 |         |         |         |         |   |
| 26 | 56 → 58 | 0.13 |         |         |         |         |   |
| 27 | N2 → 59 | 0.38 |         |         |         |         |   |
| 27 | 59 → 60 | 0.05 |         |         |         |         |   |
| 28 | N2 → 62 | 0.54 |         |         |         |         |   |

IL vs IL Fecundity

| ID | Test order | Scores (t-test) | N2L     | CBL     | CBR      | N2R      | CB_Fecundity |
|----|------------|-----------------|---------|---------|----------|----------|--------------|
| 9  | N2 → 19    | 0.11            |         |         |          |          |              |
| 9  | 19 → 20    | 0.23            |         |         |          |          |              |
| 9  | 20 → 21    | 0.53            |         |         |          |          |              |
| 9  | 21 → 22    | 3.37            | 4147051 | 4800868 | 10414073 | 11180836 | +            |
| 10 | N2 → 23    | 0.77            |         |         |          |          |              |
| 10 | 23 → 22    | 2.87            | 0       | 176721  | 2755074  | 3403575  | +            |
| 11 | N2 → 26    | 0.67            |         |         |          |          |              |
| 11 | 26 → 27    | 0.98            |         |         |          |          |              |
|    |            |                 |         |         |          |          |              |
| 21 | N2 → 45    | 0.37            |         |         |          |          |              |
| 21 | 45 → 46    | 0.31            |         |         |          |          |              |
| 21 | 46 → 47    | 0.62            |         |         |          |          |              |
| 22 | N2 → 53    | 0.36            |         |         |          |          |              |
| 22 | 53 → 49    | 0.20            |         |         |          |          |              |
| 22 | 49 → 48    | 0.77            |         |         |          |          |              |
| 22 | 48 → 47    | 0.02            |         |         |          |          |              |
| 23 | N2 → 49    | 0.72            |         |         |          |          |              |
| 23 | 49 → 50    | 0.59            |         |         |          |          |              |

|    |         |      |          |          |          |          |   |
|----|---------|------|----------|----------|----------|----------|---|
| 23 | 50 → 51 | 0.84 |          |          |          |          |   |
| 23 | 51 → 52 | 0.99 |          |          |          |          |   |
| 24 | N2 → 53 | 0.36 |          |          |          |          |   |
| 25 | N2 → 59 | 0.14 |          |          |          |          |   |
| 25 | 59 → 56 | 0.01 |          |          |          |          |   |
| 25 | 56 → 55 | 1.14 |          |          |          |          |   |
| 25 | 55 → 54 | 0.18 |          |          |          |          |   |
| 25 | 54 → 52 | 0.58 |          |          |          |          |   |
| 26 | N2 → 56 | 0.13 |          |          |          |          |   |
| 26 | 56 → 58 | 0.95 |          |          |          |          |   |
| 27 | N2 → 59 | 0.14 |          |          |          |          |   |
| 27 | 59 → 60 | 1.34 | 12748880 | 13667267 | 16371991 | 17084259 | - |
| 28 | N2 → 62 | 2.13 | 12748880 | 13667267 | 16371991 | 17084259 | - |
